# Supplementary material for: Microbiological Characteristics and Pathogenesis of Klebsiella pneumoniae Isolated from Hainan Black Goat
Source: MDPI journal article supplement (doi:10.3390/vetsci9090471), 2022-08-31
Supplement: s1 [file s1]

Figure S1. Original gel figure.

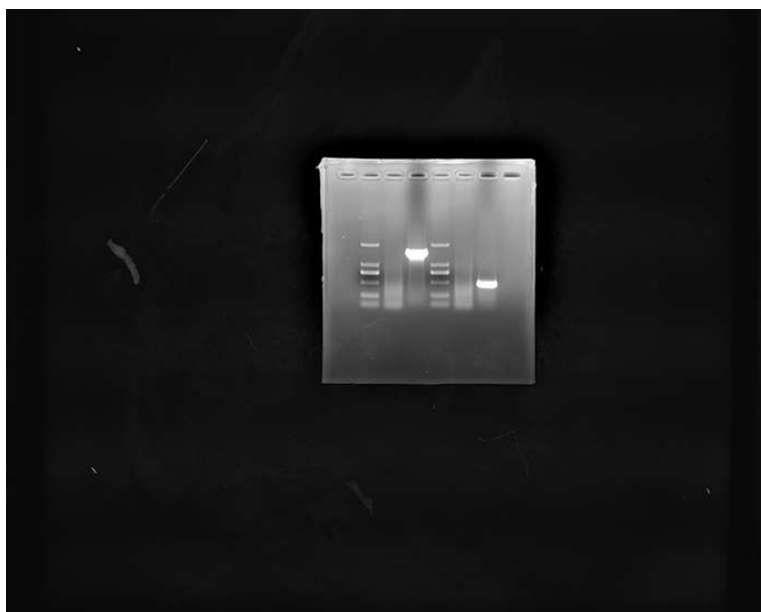

**Table S1.** Standard for judging the diameter of bacteriostatic ring in the drug susceptibility test by disk method.

| <b>Standard for judging the diameter of bacteriostatic ring in the drug susceptibility test by disk method.</b> |                                 |                                       |          |          |
|-----------------------------------------------------------------------------------------------------------------|---------------------------------|---------------------------------------|----------|----------|
| <b>Name of antibiotic</b>                                                                                       | <b>Paper content (ug/piece)</b> | <b>Zone Diameter Breakpoints (mm)</b> |          |          |
|                                                                                                                 |                                 | <b>R</b>                              | <b>I</b> | <b>S</b> |
| Penicillin                                                                                                      | 10                              | ≤14                                   | -        | ≥15      |
| Oxacillin                                                                                                       | 1                               | ≤17                                   | -        | ≥18      |
| Ampicillinum                                                                                                    | 10                              | ≤13                                   | 14-16    | ≥17      |
| Carbenicillin                                                                                                   | 100                             | ≤19                                   | 20-22    | ≥23      |
| Piperacillin                                                                                                    | 100                             | ≤17                                   | 18-20    | ≥21      |
| Cefalexin                                                                                                       | 30                              | ≤14                                   | 15-17    | ≥18      |
| Cefazolin                                                                                                       | 30                              | ≤19                                   | 20-22    | ≥23      |
| Cefradine                                                                                                       | 30                              | ≤14                                   | 15-17    | ≥18      |
| Cefuroxime                                                                                                      | 30                              | ≤14                                   | 15-17    | ≥18      |
| Ceftazidime                                                                                                     | 30                              | ≤17                                   | 18-20    | ≥21      |
| Ceftriaxone                                                                                                     | 30                              | ≤19                                   | 20-22    | ≥23      |
| Cefoperazone                                                                                                    | 75                              | ≤15                                   | 16-20    | ≥21      |
| Midecamycin                                                                                                     | 30                              | ≤13                                   | 14-17    | ≥18      |
| Norfloxacin                                                                                                     | 10                              | ≤12                                   | 13-16    | ≥17      |
| Ofloxacin                                                                                                       | 5                               | ≤12                                   | 13-15    | ≥16      |
| Ciprofloxacin                                                                                                   | 5                               | ≤21                                   | 22-25    | ≥26      |
| Vancomycin                                                                                                      | 30                              | ≤14                                   | 15-16    | ≥17      |
| Polymyxin B                                                                                                     | 300                             | ≤8                                    | 9-11     | ≥12      |
| Trimethoprim                                                                                                    | 5                               | ≤10                                   | 11-15    | ≥16      |
| Furazolidone                                                                                                    | 300                             | ≤14                                   | 15-16    | ≥17      |
| Chloramphenicol                                                                                                 | 30                              | ≤12                                   | 13-17    | ≥18      |
| Amikacin                                                                                                        | 30                              | ≤14                                   | 15-16    | ≥17      |
| Gentamicin                                                                                                      | 10                              | ≤12                                   | 13-14    | ≥15      |
| Kanamycin                                                                                                       | 30                              | ≤13                                   | 14-17    | ≥18      |
| Neomycin                                                                                                        | 30                              | ≤17                                   | 18-22    | ≥23      |
| Tetracycline                                                                                                    | 30                              | ≤11                                   | 12-14    | ≥15      |
| Doxycycline                                                                                                     | 30                              | ≤10                                   | 11-13    | ≥14      |
| Minocycline                                                                                                     | 30                              | ≤12                                   | 13-15    | ≥16      |
| Erythromycin                                                                                                    | 15                              | ≤13                                   | 14-22    | ≥23      |
| Clindamycin                                                                                                     | 2                               | ≤14                                   | 15-20    | ≥21      |
